# Supplementary material for: Methylome Analysis of Human Bone Marrow MSCs Reveals Extensive Age- and Culture-Induced Changes at Distal Regulatory Elements
Source: PubMed Central journal article supplement — Stem Cell Reports. 2017 Aug 24;9(3):999–1015. doi: 10.1016/j.stemcr.2017.07.018 (PMC5599244; doi:10.1016/j.stemcr.2017.07.018), 2017-08-24
Supplement: mmc1.pdf [file mmc1.pdf]

**Stem Cell Reports, Volume 9**

**Supplemental Information**

**Methylome Analysis of Human Bone Marrow MSCs Reveals Extensive  
Age- and Culture-Induced Changes at Distal Regulatory Elements**

**Kalyan K. Pasumathy, Naresh Doni Jayavelu, Lotta Kilpinen, Colin Andrus, Stephanie L. Battle, Matti Korhonen, Petri Lehenkari, Riikka Lund, Saara Laitinen, and R. David Hawkins**

Figure S1

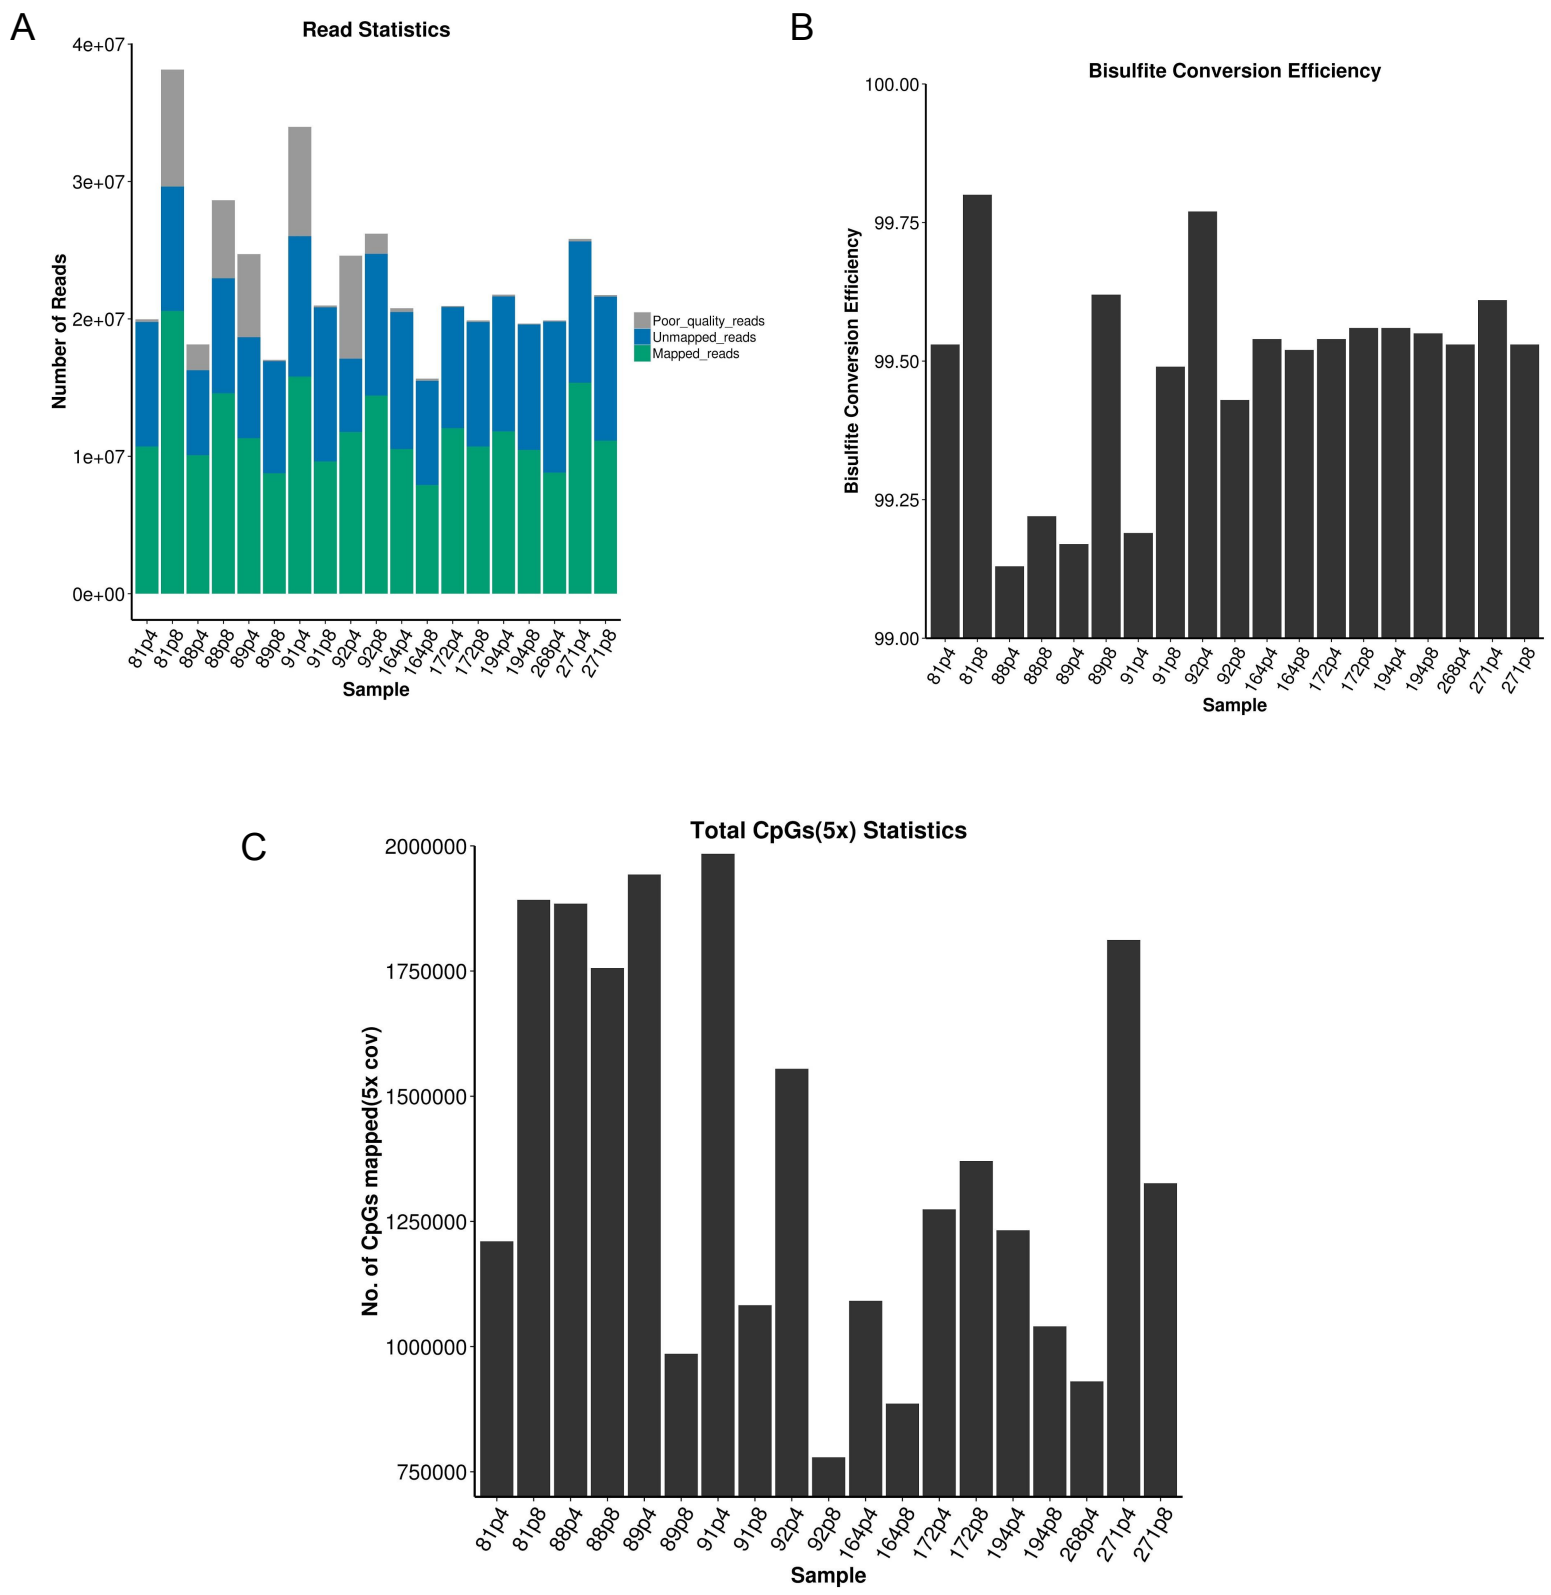

**Figure S1. Enhanced RRBS stats.** A) Methylation across the genome was captured using ERRBS (Illumina 1 x 50 bp single end sequencing). Around 50-60% of the reads were mapped to the hg19 version of the human genome. B) The data were examined for the efficiency of bisulfite conversion and is > 99% in all samples. C) Reads were mapped to hg19 and total CpGs were assessed. Number of CpGs captured varied from sample to sample and are in the range of 750,000 - 2,000,000. Related Figure 1.

Figure S2

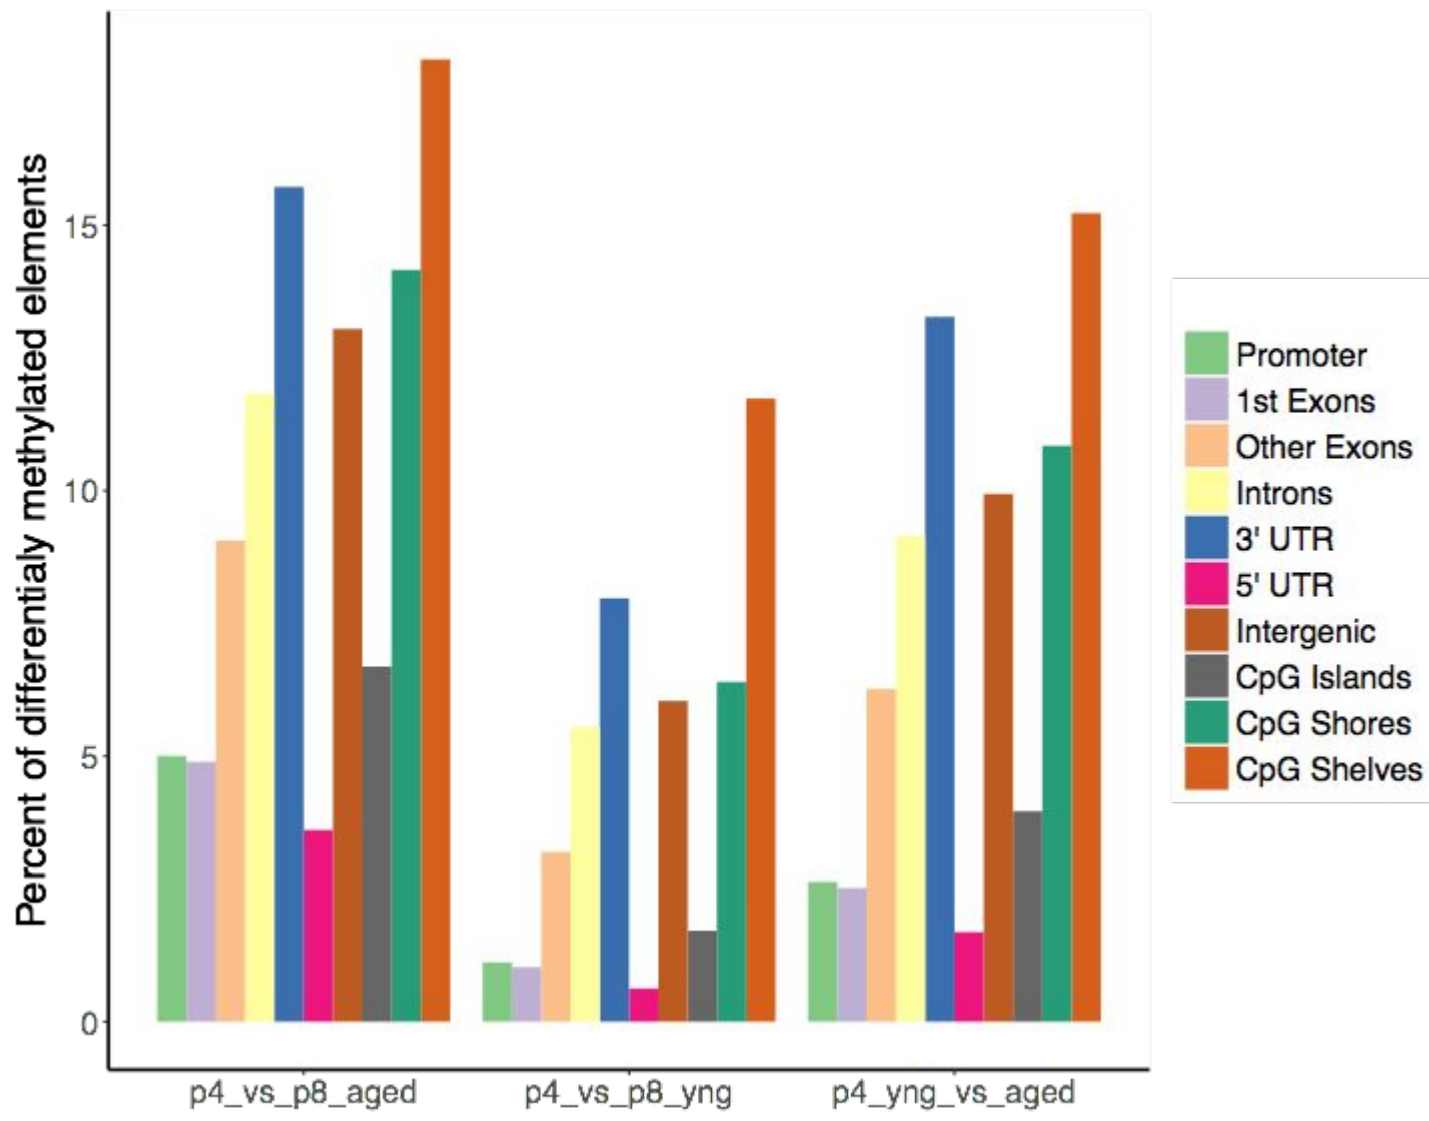

**Figure S2. Percent of Genic and CpG annotated Elements with Differential Methylation.** For each comparison (culture effect in aged - left; culture effect in young - center; age-associated - right) of ERRBS data, the percent of mapped elements that overlap at least one DMC are shown from left to right: promoters, 1st exons, all other exons, introns, 3' UTRs, 5' UTRs, intergenic regions, CpG islands, CG island shores, and CG island shelves. Related to Figure 2.

Figure S3

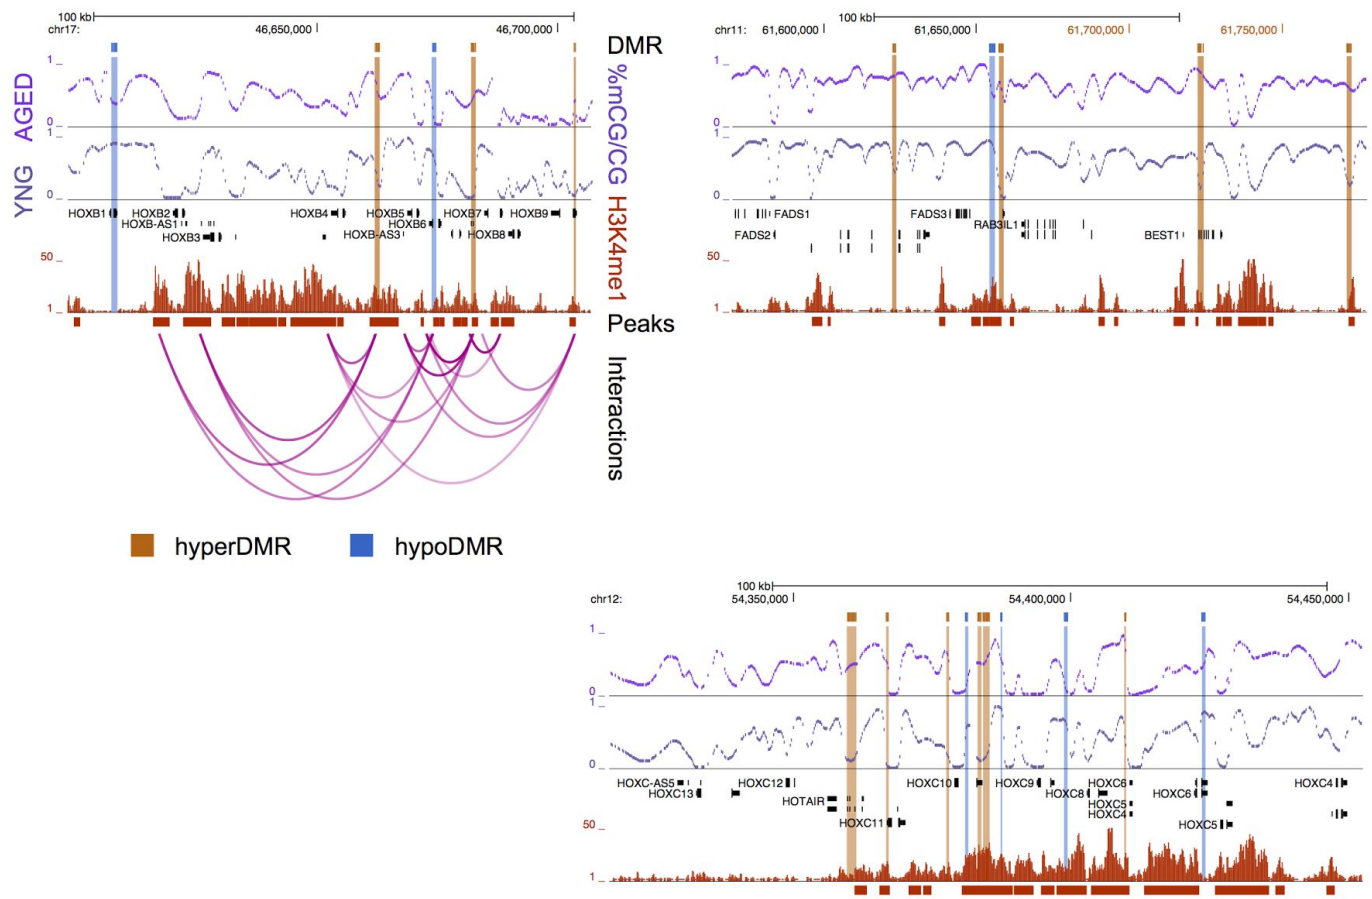

**Figure S3. Browser shots of HOXB, HOXC and FADS gene cluster.** This figure is as described in Figure 5 in the main text, and highlights DMRs at enhancer elements within the HOXB, HOXC and FADS gene clusters, which contains several genes down-regulated with age. Related to Figure 5.

Figure S4

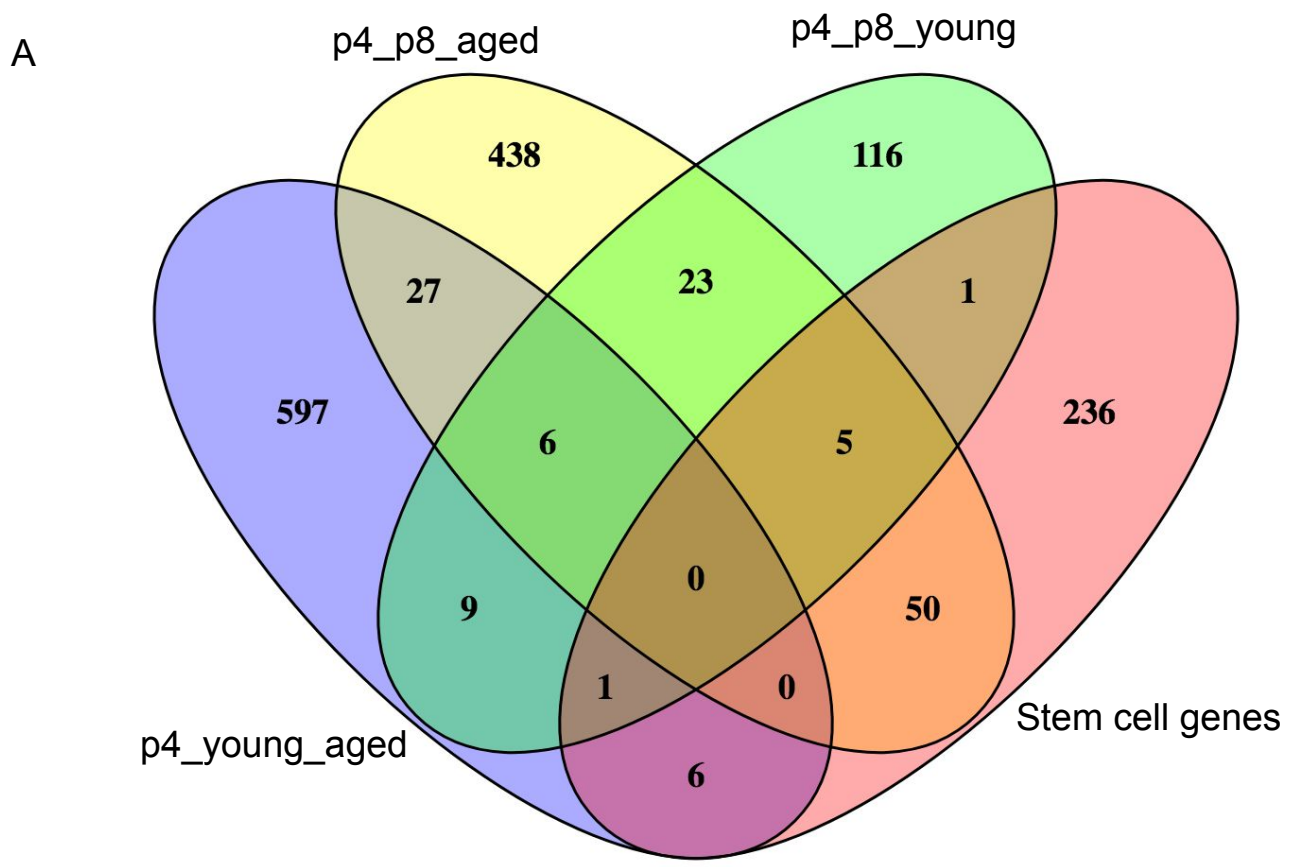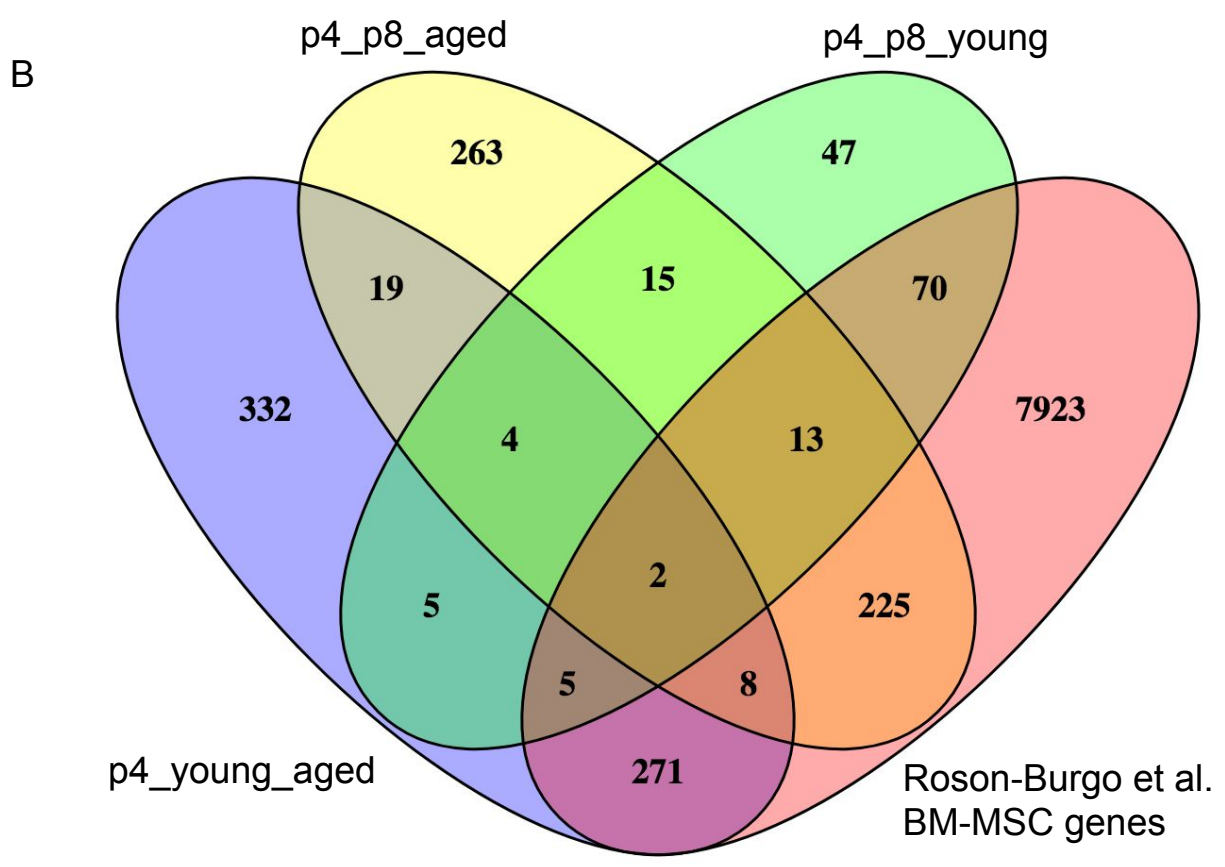

**Figure S4. Overlap of BM-MSC genes.** Overlap of BM-MSC genes from this study with stem cell genes from Muller et al., 2008 (A) and BM-MSC genes from Roson-Burgo et al., 2014 (B) comparisons. Related to Figure 6.

Figure S5

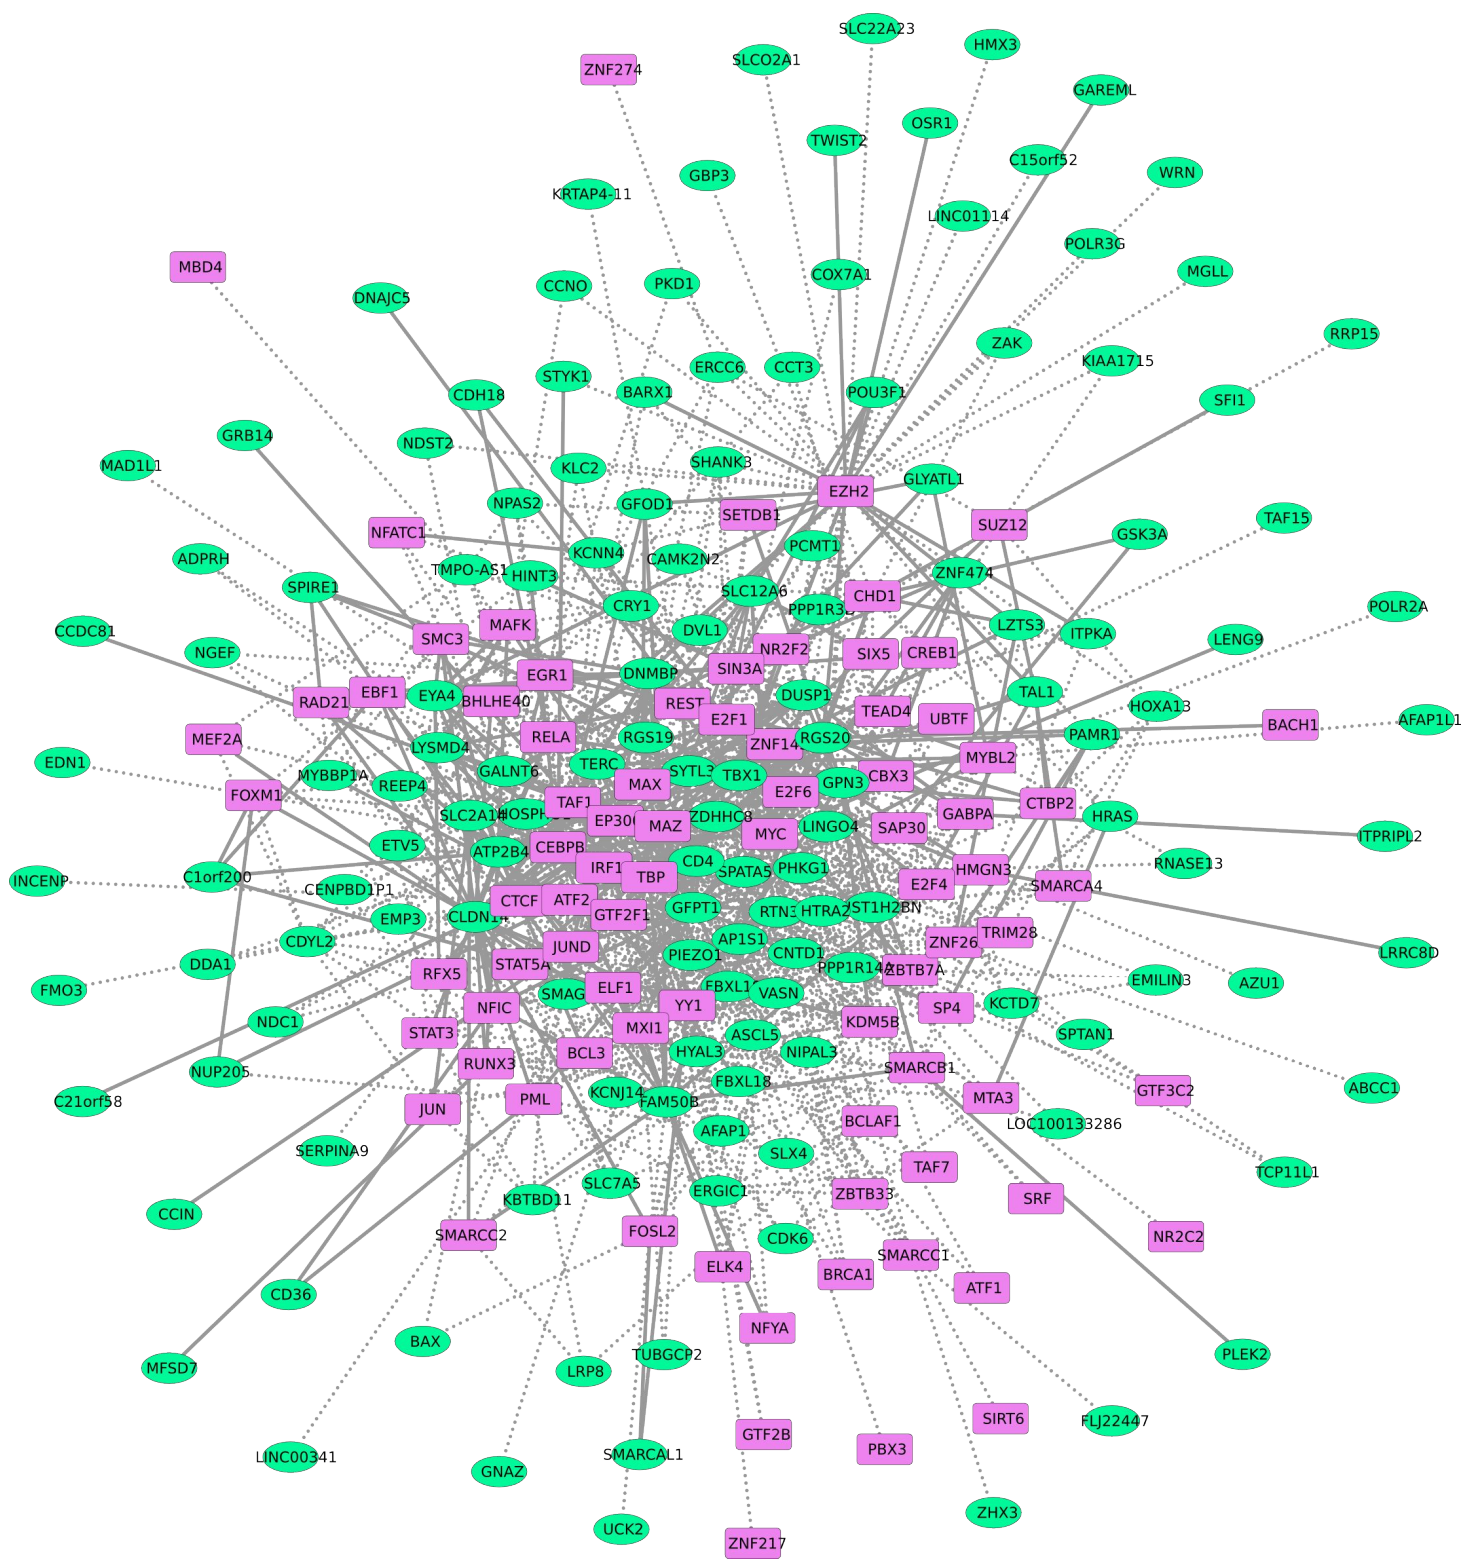

**Figure S5. The *in silico* Hypomethylation Transcriptional Regulatory Network.** The TFs (represented in magenta color) are enriched with hypomethylated CpGs and genes are activated DEGs (represented in green color), or increase with age. Here, solid lines denote direct target of TFs and dotted lines denote indirect targets. Related to Figure 7.

Figure S6

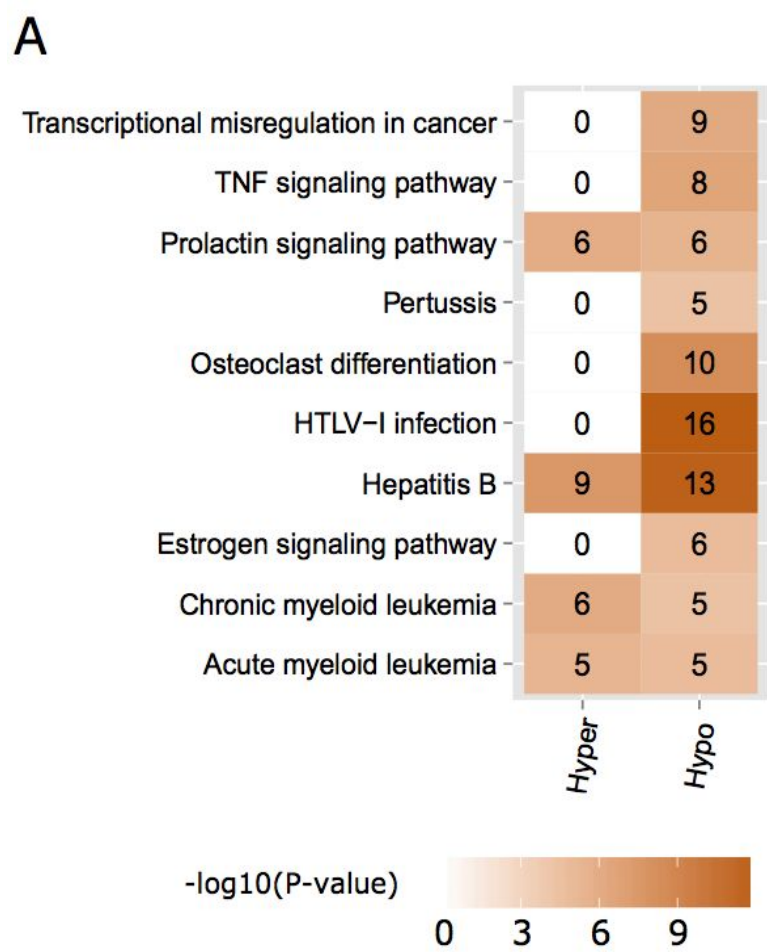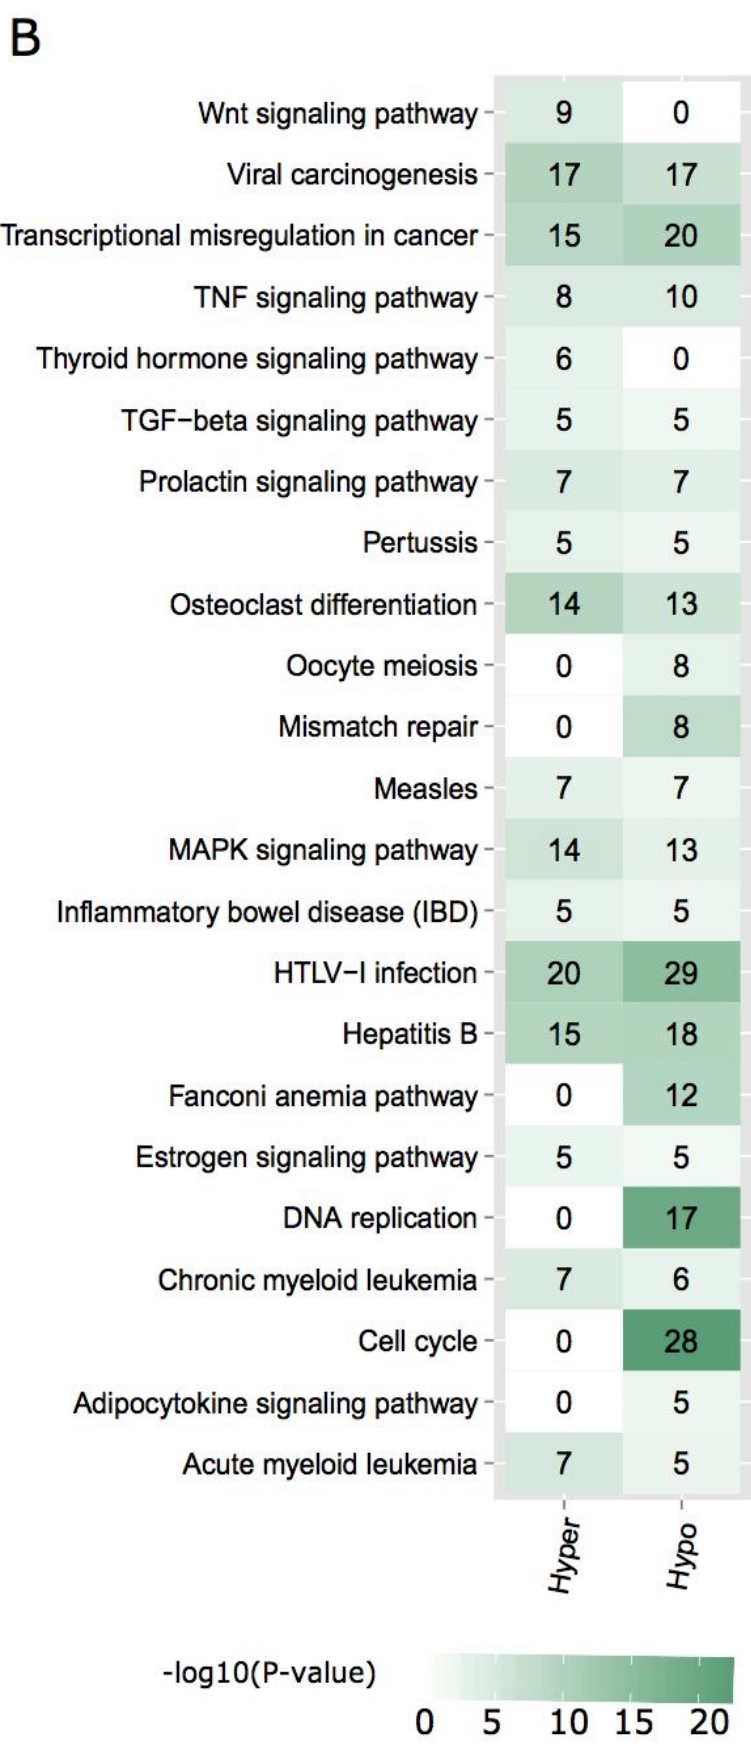

**Figure S6. Overrepresented Pathways for Culture Induced Changes.** Overrepresented pathways are identified with the list of transcription factors and differentially expressed genes (DEGs) from the p4\_vs\_p8\_yng (A) and p4\_vs\_p8\_aged (B) comparisons. The numbers indicate the number of TFs and/or DEGs involved in the pathway. Related to Figure 7.

Table 1.1

|                | Number (Percent) of CpGs mapped to genic elements |                |               |                 |               |                |
|----------------|---------------------------------------------------|----------------|---------------|-----------------|---------------|----------------|
| File_name      | Promoters                                         | First Exons    | Other exons   | Introns         | 3' UTRs       | 5' UTRs        |
| p4_vs_p8_aged  | 108097 (17%)                                      | 88329 (13.89%) | 65514 (10.3%) | 254317 (40%)    | 10597 (1.67%) | 55061 (8.66%)  |
| p4_vs_p8_yng   | 108476 (21.94%)                                   | 91837 (18.58%) | 38650 (7.82%) | 187858 (38%)    | 6571 (1.33%)  | 57593 (11.65%) |
| p4_yng_vs_aged | 105402 (18.24%)                                   | 88712 (15.35%) | 53699 (9.29%) | 228591 (39.56%) | 9017 (1.56%)  | 55004 (9.52%)  |

Table 1.2

|                | Number (Percent) of DMCs mapped to genic elements |              |               |                |              |              |
|----------------|---------------------------------------------------|--------------|---------------|----------------|--------------|--------------|
| File_name      | Promoters                                         | First Exons  | Other exons   | Introns        | 3' UTRs      | 5' UTRs      |
| p4_vs_p8_aged  | 5409 (6.78%)                                      | 4323 (5.42%) | 9617 (12.05%) | 30085 (37.7%)  | 1666 (2.09%) | 1988 (2.49%) |
| p4_vs_p8_yng   | 1210 (4.32%)                                      | 941 (3.36%)  | 3233 (11.54%) | 10420 (37.2%)  | 524 (1.87%)  | 359 (1.28%)  |
| p4_yng_vs_aged | 2774 (5.07%)                                      | 2232 (4.08%) | 6690 (12.22%) | 20896 (38.17%) | 1197 (2.19%) | 927 (1.69%)  |

Table 1.3

|                | Number (Percent) of genic elements mapped with CpGs |                |               |                |               |                |
|----------------|-----------------------------------------------------|----------------|---------------|----------------|---------------|----------------|
| File_name      | Promoters                                           | First Exons    | Other exons   | Introns        | 3' UTRs       | 5' UTRs        |
| p4_vs_p8_aged  | 13917(48.63%)                                       | 11929(39.92%)  | 15260 (7.85%) | 45861 (22.17%) | 2608 (11.97%) | 9,738 (26.28%) |
| p4_vs_p8_yng   | 13578 (48.63%)                                      | 11927 (39.91%) | 10328 (5.32%) | 33880 (16.38%) | 1810 (8.31%)  | 9805 (26.46%)  |
| p4_yng_vs_aged | 13838 (48.63%)                                      | 11866 (39.71%) | 13979 (7.19%) | 42859 (20.72%) | 2431 (11.61%) | 9749 (26.31%)  |

Table 1.4

|                | Number (Percent) of genic elements mapped with DMCs |               |              |               |              |              |
|----------------|-----------------------------------------------------|---------------|--------------|---------------|--------------|--------------|
| File_name      | Promoters                                           | First Exons   | Other exons  | Introns       | 3' UTRs      | 5' UTRs      |
| p4_vs_p8_aged  | 4662 (16.29%)                                       | 3183 (10.65%) | 6727 (3.46%) | 21721 (10.5%) | 1256 (5.76%) | 1787 (4.82%) |
| p4_vs_p8_yng   | 1076 (3.76%)                                        | 720 (2.41%)   | 2522 (1.3%)  | 8425 (4.07%)  | 456 (2.09%)  | 312 (0.84%)  |
| p4_yng_vs_aged | 2188 (7.64%)                                        | 1502 (5.03%)  | 4504 (2.32%) | 14822 (7.17%) | 875 (4.02%)  | 786 (2.12%)  |



Table 2.1

| <b>Number (Percent) of CpGs mapped to CpG annotation elements</b> |                 |                |                |                 |
|-------------------------------------------------------------------|-----------------|----------------|----------------|-----------------|
| <b>File_name</b>                                                  | <b>Islands</b>  | <b>Shores</b>  | <b>Shelves</b> | <b>Outside</b>  |
| p4_vs_p8_aged                                                     | 290641 (45.72%) | 88934 (13.99%) | 26623 (4.19%)  | 229558 (36.11%) |
| p4_vs_p8_yng                                                      | 285771 (57.80%) | 63889 (12.92%) | 14342 (2.90%)  | 130391 (26.37%) |
| p4_yng_vs_aged                                                    | 280207 (48.50%) | 78138 (13.52%) | 21836 (3.78%)  | 197588 (3.78%)  |

Table 2.2

| <b>Number (Percent) of DMCs mapped to CpG annotation elements</b> |                |                |                |                |
|-------------------------------------------------------------------|----------------|----------------|----------------|----------------|
| <b>File_name</b>                                                  | <b>Islands</b> | <b>Shores</b>  | <b>Shelves</b> | <b>Outside</b> |
| p4_vs_p8_aged                                                     | 19435 (24.36%) | 12592 (15.78%) | 4825 (6.05%)   | 42944 (53.82%) |
| p4_vs_p8_yng                                                      | 4891 (17.46%)  | 4088 (14.59%)  | 1683 (6.01%)   | 17351 (61.94%) |
| p4_yng_vs_aged                                                    | 11107 (20.29%) | 8475 (15.48%)  | 3325 (6.07%)   | 31843 (58.16%) |

Table 2.3

| <b>Number (Percent) of CpG annotation elements mapped with all CpGs</b> |                |                |                |
|-------------------------------------------------------------------------|----------------|----------------|----------------|
| <b>File_name</b>                                                        | <b>Islands</b> | <b>Shores</b>  | <b>Shelves</b> |
| p4_vs_p8_aged                                                           | 19169 (71.95%) | 19885 (41.25%) | 7388 (18.19%)  |
| p4_vs_p8_yng                                                            | 18265 (68.56%) | 16645 (34.53%) | 4796 (11.81%)  |
| p4_yng_vs_aged                                                          | 18864 (70.81%) | 19006 (39.42%) | 6663 (16.4%)   |

Table 2.4

| <b>Number (Percent) of CpG annotation elements mapped with DMCs</b> |                |               |                |
|---------------------------------------------------------------------|----------------|---------------|----------------|
| <b>File_name</b>                                                    | <b>Islands</b> | <b>Shores</b> | <b>Shelves</b> |
| p4_vs_p8_aged                                                       | 10670 (55.66%) | 9015 (45.34%) | 3520 (47.64%)  |
| p4_vs_p8_yng                                                        | 3033 (16.61%)  | 3239 (19.46%) | 1355 (28.25%)  |
| p4_yng_vs_aged                                                      | 5397 (28.61%)  | 5899 (31.04%) | 2479 (37.21%)  |

Table S2. DNA methylation statistics across CpG annotation elements. Related to Figure 2.

Table 5.1

| File_name         | Number (Percent) of DMCs mapped to genic elements |             |              |               |             |            |
|-------------------|---------------------------------------------------|-------------|--------------|---------------|-------------|------------|
|                   | Promoters                                         | First Exons | Other exons  | Introns       | 3' UTRs     | 5' UTRs    |
| all_early_vs_late | 577 (3.98%)                                       | 400 (2.76%) | 1433 (9.90%) | 4973 (34.34%) | 249 (1.72%) | 164(1.13%) |

Table 5.2

| Distribution of DMCs across CpG annotation elements during expansion |              |              |            |               |
|----------------------------------------------------------------------|--------------|--------------|------------|---------------|
| File_name                                                            | Islands      | Shores       | Shelves    | Outside       |
| all_early_vs_late                                                    | 2593 (17.9%) | 2242 (15.4%) | 877(6.05%) | 8770 (60.55%) |

Table 5.3

| File_name         | Total DMCs |
|-------------------|------------|
| p4_vs_p8_aged     | 79796      |
| p4_vs_p8_yng      | 28013      |
| p4_yng_vs_aged    | 54750      |
| all_early_vs_late | 14482      |

Table S5. DNA methylation statistics for culture changes irrespective of age.

As excel files:

Table S3. Statistical significance of DMC overlap analysis. Related to Figure 2.

Table S4. Methylation changes at TFBS (ERRBS). Related to Figure 3.

Table S6. Putative enhancer DMR-gene interactions. Related to Figure 5.

Table S7. Biological aging induced DNA methylation changes at TFBS (WGBS). Related to Figure 7.

## **Supplemental Experimental Procedures**

### **Isolation and Cell Culture of BM-MSCs**

Human BM-MSCs were obtained from bone marrow aspirates taken from the iliac crest or upper femur metaphysis of adult patients after written informed consent. All patient protocols were approved by the Ethical Committee of Northern Ostrobothnia Hospital District or Ethical Committee of Hospital District of Helsinki and Uusimaa. Human BM-MSCs from five aged (from 62 to 82 years of age, mean 74.6 years) and five young adult donors (from 20 to 24, mean 22.2 years) were isolated and cultured as previously described (Leskelä et al. 2003; Peura et al. 2009; Kilpinen et al. 2013). Briefly, by growth in minimum essential alpha-medium ( $\alpha$ MEM) supplemented with 20mM HEPES, 10% heat inactivated fetal bovine serum (FBS), 2mM L-glutamine and 100 units/mL penicillin and 100  $\mu$ g/mL streptomycin (all from Gibco, Invitrogen, Paisley, UK). The same serum lot was used throughout the study. The cells were plated at a density of 1000 cells/cm<sup>2</sup>, medium was renewed twice a week and the cells were harvested when 70-80% confluent. Only four of five aged samples were carried to passage 8 and therefore used in the aged p4\_vs\_p8 comparison (Figure 1).

### **ERRBS and WGBS Library Preparation**

For ERRBS, DNA (10 ng) was digested with MspI (Thermo Fisher, Cat # FD0544). Digested DNA was subjected to end repair using NEBNext End repair module (New England Biolabs, Cat# E6050S) followed by clean-up with Ampure XP beads. Further subjected to A-tailing reaction using NEBNext-dA-tailing module (Cat# E6053) and clean-up with beads. Purified A-tailed unmethylated lambda DNA (Promega, Cat# D1521) was spiked-in at 0.1-0.5% and mixed with methylated oligo adapters (20 $\mu$ M). Ligation was performed with NEBNext Quick Ligation module (New England Biolabs, Cat# E6056S). Ligated DNA was purified with Ampure XP beads. Ligated and purified DNA was subjected to bisulfite conversion using MethylCode Bisulfite conversion kit (Thermo Fisher, Cat# MECOV-50) and purified as per protocol. Purified DNA was subjected to 18 cycles of PCR amplification with KAPA HiFi HotStart Uracil+ (KAPABiosystems Cat# KK2802) and purified. 1-2  $\mu$ l of purified library subjected to second round of PCR amplification for 2-4 cycles of PCR and purified with Ampure XP beads. Purified library was subjected to sequencing with Illumina HiSeq 2500 single end 50bp sequencing. For WGBS, genomic DNA (30ng in a

volume of 130 ul) was subjected to sonication using Covaris sonicator until DNA is sheared into fragments of size 40bp to 600bp. Sheared DNA was purified using Ampure XP beads. WGBS libraries were prepared similar to ERRBS library.

### **ChIP-seq Data Analysis**

H3K4me1 data from four human BM-MSC donors was obtained from the Roadmap Epigenome Consortium. Peaks were called using MACS version 1.4.2 on individual H3K4me1 ChIP-seq replicates normalized to input to assess reproducibility (Zhang et al. 2008). Peaks were recalled on merged replicates and used for further analysis.

### **Gene Expression**

Gene expression data from donor samples at each passage was previously described (Kilpinen et al. 2013). Data from this publication were utilized in this work to assess the correlation between gene expression and the methylation changes on the genome.

### **Pathway Analysis**

ClueGO (Bindea et al. 2009) was used to identify the enriched pathways with the data from KEGG pathways. The statistically significant pathways were filtered with P-value < 0.05 and P-values are adjusted with Benjamini Hochberg method for multiple hypothesis correction.

### **Transcriptional Regulatory Network Construction**

First we identified the TFs at significantly enriched with DMCs. Next, we checked whether their TFBS are overlapping within promoter regions of DEGs and termed these DEGs as direct targets. Next, we identified the nearest neighboring gene (NNG) for these TFBS and termed as their indirect targets. In addition, we included only only down- and up-regulated DEGs for hyper and hypomethylated TFs as targets respectively. Cytoscape software (Shannon et al. 2003) was used for visualization of the networks.

### **DMR-Gene Interaction Data**

We downloaded the DHS elements and promoter interaction data from (Sheffield et al. 2013). These interactions are based on correlation between DHS signal intensity and gene expression pattern across numerous human cell types. Only positive correlation interactions are included for further analysis. We overlapped identified DMRs with DHS elements to find DMR-gene interactions further filtered interactions with only differentially expressed genes (DEGs).

## SUPPLEMENTARY REFERENCES

- Bindea, Gabriela, Bernhard Mlecnik, Hubert Hackl, Pornpimol Charoentong, Marie Tosolini, Amos Kirilovsky, Wolf-Herman Fridman, Franck Pagès, Zlatko Trajanoski, and Jérôme Galon. 2009. "ClueGO: A Cytoscape Plug-in to Decipher Functionally Grouped Gene Ontology and Pathway Annotation Networks." *Bioinformatics* 25 (8): 1091–93.
- Kilpinen, Lotta, Feven Tigistu-Sahle, Sofia Oja, Dario Greco, Amarjit Parmar, Päivi Saavalainen, Janne Nikkilä, et al. 2013. "Aging Bone Marrow Mesenchymal Stromal Cells Have Altered Membrane Glycerophospholipid Composition and Functionality." *Journal of Lipid Research* 54 (3): 622–35.
- Leskelä, Hannu-Ville, Juha Risteli, Salla Niskanen, Jussi Koivunen, Kaisa K. Ivaska, and Petri Lehenkari. 2003. "Osteoblast Recruitment from Stem Cells Does Not Decrease by Age at Late Adulthood." *Biochemical and Biophysical Research Communications* 311 (4): 1008–13.
- Peura, Matti, Jozef Bizik, Pertteli Salmenperä, Ariel Noro, Matti Korhonen, Tommi Pätilä, Antti Vento, et al. 2009. "Bone Marrow Mesenchymal Stem Cells Undergo Nemo-sis and Induce Keratinocyte Wound Healing Utilizing the HGF/c-Met/PI3K Pathway." *Wound Repair and Regeneration: Official Publication of the Wound Healing Society [and] the European Tissue Repair Society* 17 (4): 569–77.
- Shannon, Paul, Andrew Markiel, Owen Ozier, Nitin S. Baliga, Jonathan T. Wang, Daniel Ramage, Nada Amin, Benno Schwikowski, and Trey Ideker. 2003. "Cytoscape: A Software Environment for Integrated Models of Biomolecular Interaction Networks." *Genome Research* 13 (11): 2498–2504.
- Sheffield, Nathan C., Robert E. Thurman, Lingyun Song, Alexias Safi, John A. Stamatoyannopoulos, Boris Lenhard, Gregory E. Crawford, and Terrence S. Furey. 2013. "Patterns of Regulatory Activity across Diverse Human Cell Types Predict Tissue Identity, Transcription Factor Binding, and Long-Range Interactions." *Genome Research* 23 (5): 777–88.
- Zhang, Yong, Tao Liu, Clifford A. Meyer, Jérôme Eeckhoute, David S. Johnson, Bradley E. Bernstein, Chad Nusbaum, et al. 2008. "Model-Based Analysis of ChIP-Seq (MACS)." *Genome Biology* 9 (9): R137.
